# Supplementary material for: Quantifying particle-to-particle heterogeneity in aerosol hygroscopicity
Source: Copernicus journal article supplement (doi:10.5194/acp-2022-787), 2022-11-29
Supplement: Supplementary file 1 [file acp-2022-787-supplement.pdf]

*Supplement of:*

**Quantifying particle-to-particle heterogeneity in aerosol hygroscopicity**

**Liang Yuan<sup>1,2</sup>, Chunsheng Zhao<sup>2, \*</sup>**

*1 Chengdu Plain Urban Meteorology and Environment Scientific Observation and Research Station of Sichuan Province, School of Atmospheric Sciences, Chengdu University of Information Technology, Chengdu 610225, China*

*2 Department of Atmospheric and Oceanic Sciences, School of Physics, Peking University, Beijing, 100871, China*

*\*Correspondence: Chunsheng Zhao ([zcs@pku.edu.cn](mailto:zcs@pku.edu.cn))*

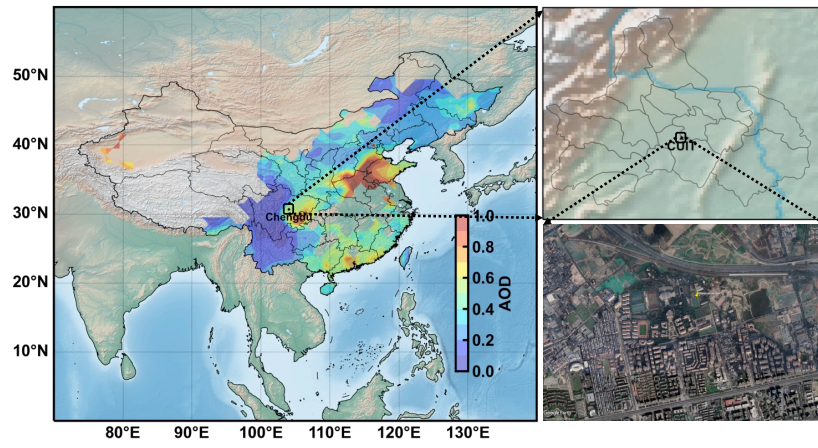

**Figure S1.** Location of the observation site. The contour represents the average AOD in January 2019.

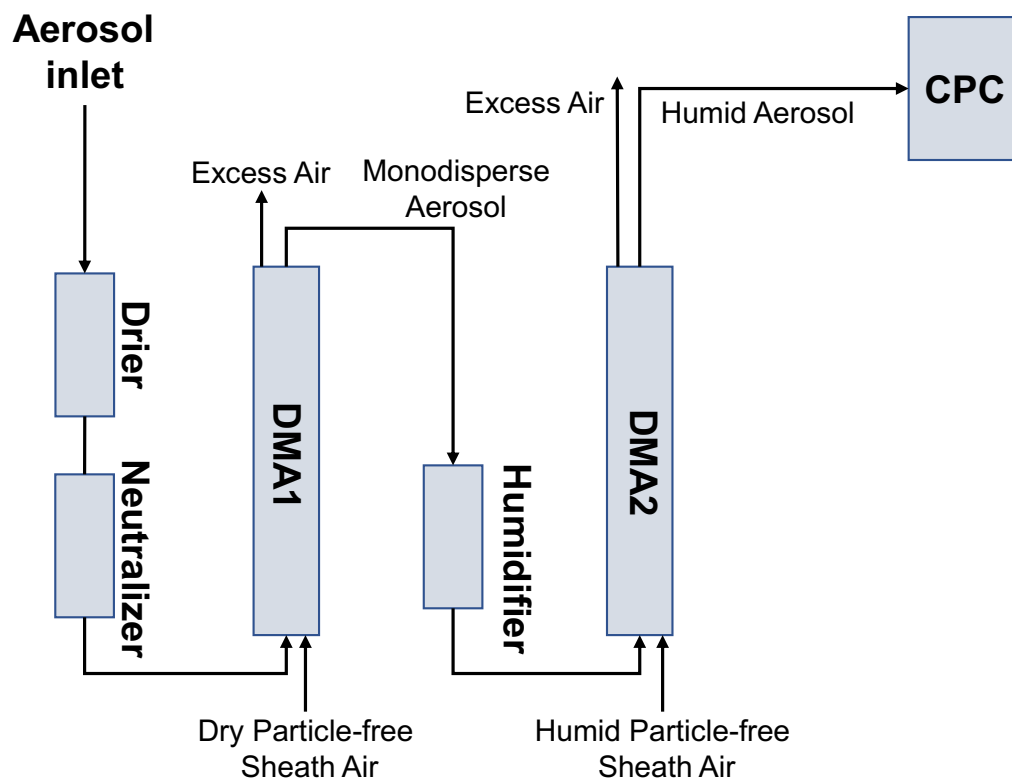

**Figure S2.** Schematic structure of the HTDMA

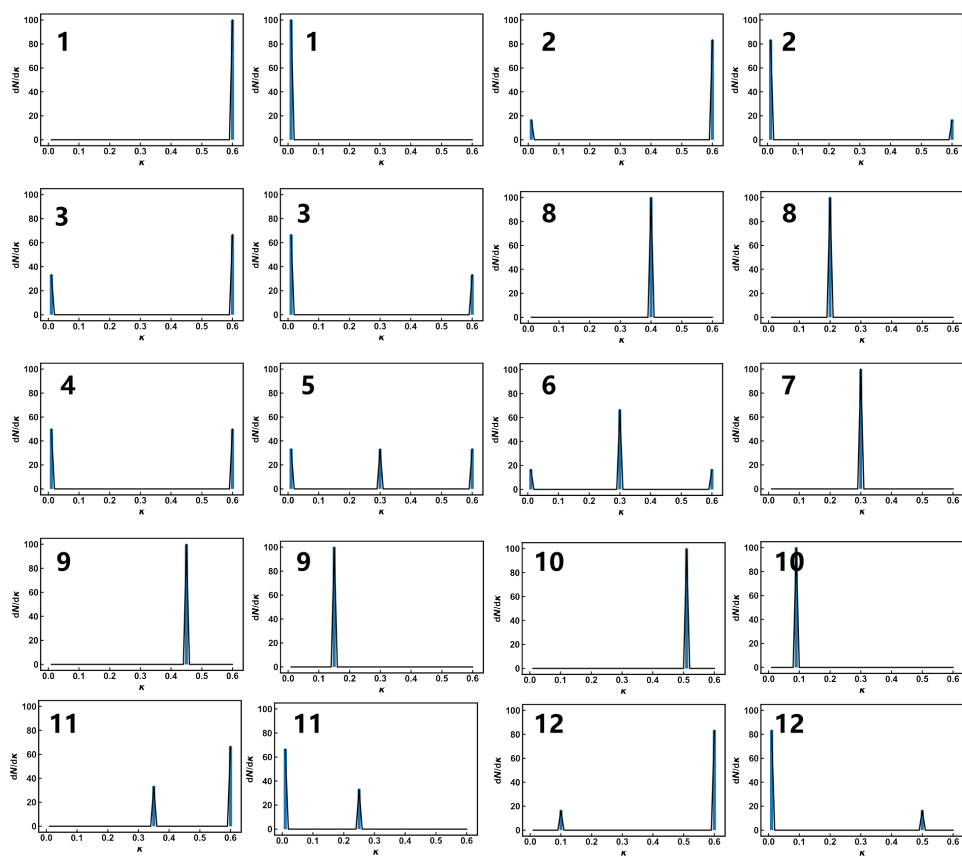

Figure S3.  $\kappa$ -PDFs for the 12 populations in the mixing state diagram.
